# Supplementary material
Source: bioRxiv or medRxiv preprint supplement (https://www.biorxiv.org/highwire/filestream/31839/field_highwire_adjunct_files/1/108324-2.pdf)
Supplement: Supplementary file [file 108324-2.pdf]

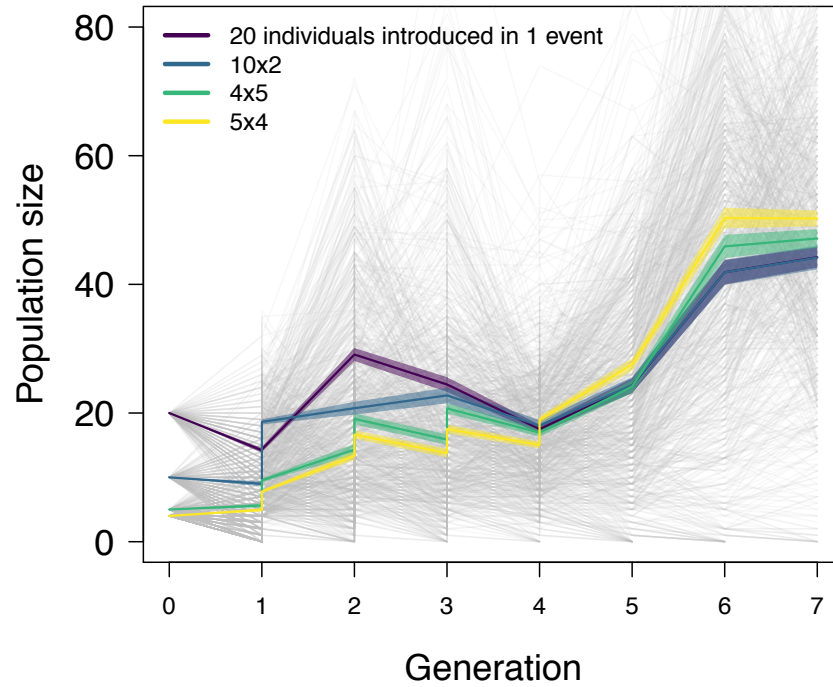

**Supplementary Figure 1.** Population trajectories for 842 populations of *Tribolium* in the microcosm experiment. Vertical steps in the population size represent additional migrant individuals in introduction regimes with more than 1 introduction. Light grey lines represent individual population trajectories, and colored lines represent the mean size of extant populations for each of the 4 introduction regimes. Shading around the colored lines represents the mean size of extant populations plus and minus one standard error.

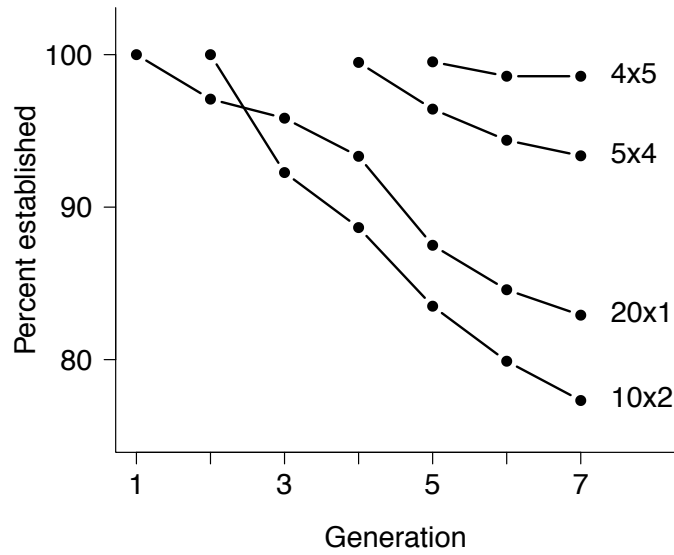

**Supplementary Figure 2.** Percent of microcosm populations that were established in each generation for the 4 different introduction regimes. Data are pooled across the two environmental stability treatments. The introduction regimes are as follows: 20x1 = 20 individuals in the first generation, 10x2 = 10 individuals in each of the first two generations, 5x4 = 5 individuals in each of the first 4 generations, and 4x5 = 4 individuals in each of the first 5 generations.
